# Supplementary material for: An empirical zenith wet delay correction model using piecewise height functions
Source: Copernicus journal article supplement (doi:10.5194/angeo-2018-49), 2018-05-28
Supplement: Supplementary file [file angeo-2018-49-AC2-supplement.pdf]

## Responses to Referee #2

We thank the referee #2 for the insightful comments and constructive suggestions. We have addressed all their comments in the revised manuscript. Below are our responses to the referee's critical comments (*Italics*). The page and line numbers in our responses refer to those in the revised manuscript.

*General comment to all figure captions: add to captions the necessary information to understand what each figure represents, e.g. the location of the represented point, etc. Each figure should be self-explanatory.*

**Authors:** We rewrote all figures captions to make them more self-explanatory as you suggested (Figures 1-14 in the paper).

*The plots of ZWD against height are more intuitive if ZWD is given in x-axis and height in the y-axis. Although not mandatory, please consider changing the plots accordingly.*

**Authors:** As you suggested, we switched the x-axis and y-axis of some plots (Page 6, Figures 1-2; Page 8, Figures 3-4) to make them more intuitive.

*The authors should distinguish between the various types of ZWD models, namely:*

*(1) Models that make use of observations (e.g. radiosonde profiles) or 3D fields from atmospheric models (e.g. ECMWF) such as the Davis et al, 1995, Eq. (1). These provide the best accuracy as they model the spatial, temporal and vertical variations of the field.*

*(2) Models that make use of single layer parameters such as total column water vapour (TCWV) and temperature, such as those by Bevis et al. 1992, 1994. See for example, Fernandes et al., 2013 for a reference to the use of this model and that of Stum et al., 2011 which only uses TCWV. These provide similar results to those in (1) but only at the level of the model orography to which the meteorological parameters refer to. Note that TCWV includes the modelling of the amount of water vapour along the vertical profile up to the reference orography, so the result is not very different from case (1). As this orography may depart significantly from the actual surface and the vertical variation of the ZWD is not well known, at a different surface elevation they possess errors associated with the uncertainty in the modelling of the ZWD height variation (see for example Fernandes et al, 2014, Vieira et al., 2017).*

*(3) Models such as Saastamoinen or Hopfield, that make use only of surface observations, these lack information about the vertical distribution of the water vapour, so they are considerably less accurate than (1) and (2)*

*(4) Climatologist which, unlike the other mentioned approaches, do not use observations nor meteorological parameters from atmospheric models; they attempt to model the space-time and sometimes also the vertical variation of the ZWD field, such as the GPT2w type of models.*

*Clearly, the paper proposes a model that belongs to the last type. The paper would benefit from a clarification of this nature, putting this study into the right context. Moreover, the accuracy of each of the two climatology models used in the paper for comparison with the new model (GPT2w, and UNB3m)) should be clearly indicated as quoted by the respective authors (e.g. 3.6 cm for GPT2w)*

**Authors:** We accepted your suggestions and rewrote the introduction to clarify the four types of ZWD models and clearly indicated the accuracies of the GPT2w and UNB3m model (Page 2, Line 48 to Page 3, Line 77).

*The paper should include a brief description of the space-time variability of the ZWD field as well as of its vertical variation, as published in the literature, including proper references. The vertical variation is mentioned in section 2, but the space-time variations are missing. About the vertical variation, the work by Kouba, 2008 is worth mentioning.*

**Authors:** We added a description of the space-time variability of the ZWD as “Its spatial distribution is characterized with a near-zonal dependency, with values varying from about 2 cm at high latitudes to about 35 cm near the equator (Fernandes et al., 2013). The temporal variation pattern of ZWD is mainly characterized by the seasonal variability including annual and semi-annual components (Jin et al., 2007; Nilsson et al., 2008). The high variabilities in ZWD make itself the main factor influencing tropospheric delay correction.”(Page 2, Lines 41-47). About vertical variation of ZWD, we added a sentence as “Kouba (2008) proposed an empirical exponential model to account for the height dependency of ZWD, but it only be applicable within the height below 1000 m.”(Page 3, Lines 80-82).

*The use of the words “obvious” and “obviously” is not recommend in scientific writing. I suggest to replace them throughout the text by “clear” or similar synonyms.*

**Authors:** We replaced the words by other synonyms (e.g., clear, evident) throughout the paper as you suggested.

*In Eq. (1) the authors quote the values for the refractivity constants as given by Bevis et al, 1992. However, Bevis et al, 1994 revisited these constants. I recommend the addition of this reference (see list of some suggested references at the end of this review) and of the updated values for the constants ( $k_3=3.739 \times 10^5 \text{ K}^2\text{mbar}^{-1}$ ;  $k_2' = 22.1 \text{ Kmbar}^{-1}$ ).*

**Authors:** We revised the values for the constants and corresponding reference as you suggested. (Page 4, Lines 101-102)

*Authors should justify the use of “pressure levels” instead of “model levels” as, according to ECMWF, for wet path delay computations the second should be adopted as they lead to better accuracy.*

**Authors:** The figures below show the water vapour pressure and ZWD derived from pressure levels and model levels data at the representative grid point (0 °N, 0 °E) at 12:00 UTC on 1 January, 2005. From the figures we can see that the model levels-derived water vapour pressure data and ZWD data are denser than that derived from pressure levels above 20 km, and the water vapour pressure and ZWD are quite close to zero. **About ZWD comparison, the RMS between these two data is about 0.11 mm.** Considering such small difference, there is almost no difference in ZWD modelling with pressure levels or model levels data in our study, especially the modelling focuses on the height interval below 10 km.

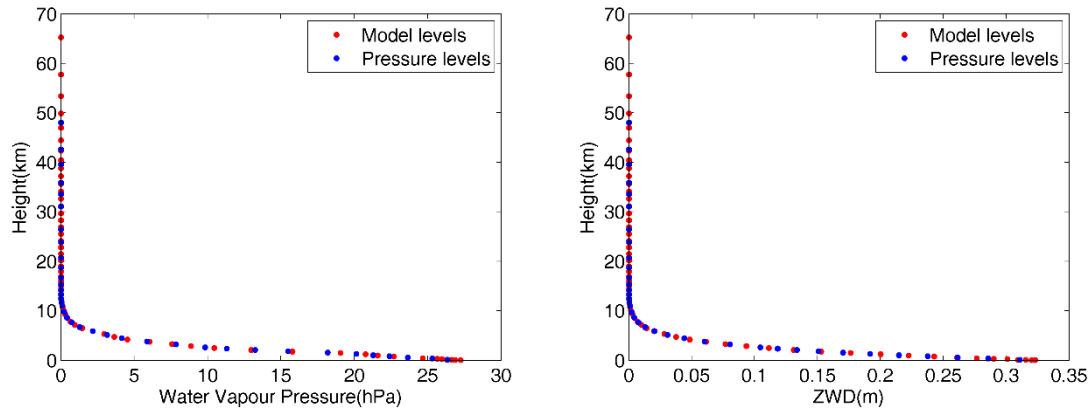

*Although ECMWF allows the extraction of ERA Interim with various spatial resolutions, the actual spatial resolution of the model is  $0.75^\circ \times 0.75^\circ$  (regular grid) or about 80 km (Gaussian grid), Dee et al., 2011. Please rephrase the sentence describing the model accordingly.*

**Authors:** We rephrased the sentence as “ERA-Interim can provide data at 0:00, 6:00, 12:00, and 18:00 UTC daily with a spatial resolution of not more than  $0.75^\circ \times 0.75^\circ$  and 37 pressure levels (Dee et al., 2011).” (Page 4, Line 115 to Page 5, Line 117)

*Equation (2): a reference should be provided for the first line of Eq. (2).*

**Authors:** We added a reference to Böhm and Schuh (2013). (Page 5, Line 121)

*Caption of Figure 1 – Please add time and place to which profiles correspond.*

**Authors:** We added time and place as you suggested. (Page 6, Lines 147-148)

*Caption of Figure 2 – Please explain how these figures were made. Points represent mean values of ZWD gradients for which period and location?*

**Authors:** We rewrote the caption as “ZWD vertical gradients profile (a) and linear fit with height below 2 km (b) at a grid point ( $0^\circ\text{N}$ ,  $0^\circ\text{E}$ ) at 12:00 UTC on 1 January, 2010.” (Page 6, Lines 150-151)

For better understanding, we also added a sentence about ZWD vertical gradients in the context as “Further, the derivative of the ZWD with respect to height (i.e., ZWD vertical gradient) is analyzed to better understand the characteristic of the ZWD vertical distributions.” (Page 5, Lines 137-139)

*The sentence “the ZWD gradients at high latitudes are much larger and water vapour is more variable than at low latitudes, resulting from the fact that the water vapour at high latitudes are more variable” is not true and needs rephrasing. Please see for example figures 1 and 2 in Fernandes et al, 2013 for the mean and standard deviation of the ZWD. You can see that the ZWD variability is largest in the tropics and minimum at high latitudes. In the paper you probably refer to the variation of ZWD with height. Even in this case the sentence is also not true as the scales in the various plots in figures 3 and 4 are different. Please use the same scale in all figures, so that they can be compared. Some additional background information about the ZWD variability (in space, time and vertically) by citing references such as the one mentioned above should be given at the introduction.*

**Authors:** It's a mistake. We replotted the figures with same scale and corrected the interpretation as "It is worth noting that the ZWD gradients at low latitudes are much larger and water vapour is more variable than at high latitudes, resulting from the fact that the water vapour at low latitudes are more variable." (Page 6, Lines 155-157; Page 8, Figures 3-4). Figure 3 and Figure 3 were replotted with same scale. (Page 8, Figures 3-4). The background information about the ZWD variability were added. (see previous response)

*In "and semi-annual, cycles" please remove the " ,".*

**Authors:** Done. (Page 11, Line 225)

*Table1 – I don't understand what is represented in the first line of the table. According to the text, the piecewise height functions statistics should be the same to those for the quadratic functions for the layer 0-2km and to the exponential functions in the other two cases. Please explain.*

**Authors:** For other scholars such as Song et al. (2011), the single function is used to fit the ZWD variations respect to height **throughout the whole troposphere**. While in our study, we used three functions to fit the ZWD **in three different height intervals**. In the second row of Table 1, it gives the fitting performances of piecewise height functions in three height intervals. To be consistent with the common fitting methods such as Song et al. (2011), single quadratic polynomial is used to fit the ZWD throughout the whole height interval below 10 km. Therefore, the third row of Table 1 shows **the part RMSs of single quadratic polynomial fitting in three height intervals**, which is different from the results of piecewise height functions. For clarity, we rewrote the interpretation as "Table 1 summarises the global fitting statistics of different fit functions, demonstrating the superiority of piecewise height functions to the single polynomial function and single exponential function used for the whole troposphere." (Page 7, Lines 174-176)

*Figure 6 – for comparison of the various plots the sane colour scale should be used. In this way the decrease of ZWD with height would be clearer.*

**Authors:** Done. (Page 12, Figure 6)

*"For each grid point, there are 27 parameters" – please indicate explicitly the 27 parameters, e.g. 5 for  $Z_1$ , etc.*

**Authors:** We rewrote the sentence as "Each grid point contains 7 primary coefficients:  $z_1$ ,  $a_1$ ,  $a_2$ ,  $z_2$ ,  $\beta_2$ ,  $z_3$ , and  $\beta_3$ . Among these coefficients,  $z_1$ ,  $z_2$ ,  $z_3$ ,  $a_1$ , and  $a_2$  are further expressed by the equation (4) with 5 temporal parameters, respectively. Therefore, there are 27 parameters for each grid point and total 68094 parameters for the HZWD model". (Page 12, Line 249 to Page 13, Line 252)

*Please avoid using the same symbol for different variables in different equations, e.g.  $\beta$ .*

**Authors:** We replaced the symbol  $\beta$  with  $\gamma$  in equations (7) (Page 14). The other symbols have the same meanings.

*In my view, the sub-section on the validation using ECMWF ERA Interim data for the year 2015 does not add any information to the validation performed with radiosondes. Indeed, the comparison with ECMWF data from a different period is not a true validation. Since the HZWD model only uses*

*periodic functions (annual and semi-annual), examining the differences between model predictions and ECMWF-derived ZWD for a year inside or outside the 10-year period used in model fitting should give very similar results. This would not be the case if e.g. the HZWD model included inter-annual signals. Please try to explain the utility of including this analysis or consider removing it from the paper.*

**Authors:** The HZWD model is established using ERA-Interim **monthly mean pressure levels data from 2001 to 2010**. In validation, the pressure levels data with **time resolution of 6 h over 2015** are used. These two data are different in period and temporal resolution, so we can use the more accurate ECMWF data (with the full temporal resolution of 6 hours) in a different year (2015) to validate the empirical seasonal models. We have emphasized it in the paper as “The establishment of the HZWD model is based on the monthly mean profiles of ERA-Interim pressure levels data from 2001 to 2010, while we used the ERA-Interim pressure levels data with the full time resolution of 6 hours in 2015 for the model validation”. (Page 15, Lines 301-304). To make it more clearly, we added a new sentence as “This is to validate the model performance on the daily scale.” (Page 15, Line 304)

*Please define RMS.*

**Authors:** We added the definition as “root mean square (RMS) error”. (Page 13, Line 271)

*In the sentence “In equation (5) and (6),  $ZWD_i^M$  is the value estimated by the model and  $ZWD_i^0$  is the reference value.”, clarify the sentence by writing “In equation (5) and (6),  $ZWD_i^M$  is the value estimated by the HZWD model developed in this study and  $ZWD_i^0$  is the reference value.”*

**Authors:** Done. (Page 13, Lines 275-276)

*In Eq. (7) please specify full expressions and how each term is computed:  $T_m$ ,  $g_m$ , etc.*

**Authors:** We specified all terms (Page 14, Lines 281-285) and gave the expressions to calculate  $T_m$  and  $g_m$ . (Page 14, Eq. (8) and Eq (9))

*In Eq. (8) please define all terms and describe how they are computed.*

**Authors:** Since the terms in the equation have been defined in the aforementioned equations in the paper, we choose not to repeat the definitions. As you suggested, we added the descriptions about how to compute the  $T_m$  and  $g_m$  in the equation. (Page 14, Lines 295-296)

*The equivalent to Figure 10 but for the RMS instead of the bias should be added. This would give a better indicator of each model accuracy. The same should be done for the comparison with radiosondes (Figure 14)*

**Authors:** We replotted Figure 10 and Figure 14 and rephrased the corresponding interpretations as you suggested. (Page 17, Lines 361-369; Page 19, Figure 10; Page 24, Figure 14)

*Replace “precusion” by “precision”*

**Authors:** Done. (Page 20, Line 413)

*The sentences “Taking the uncertainty of radiosonde ZWD into account, the improvement of HZWD model over GPT2w model below 2 km seem to be insignificant. However, the validation is based on*

*the same radiosonde ZWD values and the RMS error of ZWD of HZWD is smaller, thus we can reasonably expect that the ZWD of HZWD is closer to true ZWD value than the ZWD of GPT2w in spite of the uncertainty of radiosonde ZWD.” are confusing and repetitive. Please rephrase the second sentence and try to split into shorter sentences.*

**Authors:** We rewrote the sentence as “Taking the uncertainty of radiosonde ZWD into account, the improvement of HZWD model over GPT2w model below 2 km seem to be insignificant. Nevertheless, we can reasonably think that the ZWD predicted by HZWD is closer to true ZWD due to its smaller RMS error.” (Page 21, Lines 418-421)

*Mentioning the percentage of improvement for the various layers may be misleading as e.g. 33% of the signal for the top layer is only 2-3 mm, which is insignificant. Authors should put their results into perspective of the magnitude of the ZWD field in each layer.*

**Authors:** In the revised paper, we clearly indicated the values of the improvements for each layer (Page 25, Line 491, 495-496). We also added the ZWD fields in each layer and indicated the significant improvements at the top layer. (Page 25, Lines 498-500) Since the aim of HZWD model is to provide the ZWD corrections for real-time aircraft positioning, the millimeter level improvements are quite important for the height estimates. We added the interpretation of the effects of the ZWD errors on the height estimates in positioning as well as the corresponding reference. (Page 3, Line 87 to Page 4, Line 88; Page 25, Lines 491-493, Lines 497-498)

*The last paragraph of the paper is an example of the need for language improvement:*

*“The HZWD model offers good precision stability in the vertical direction and can meet the requirements of ZWD correction at different heights within the troposphere; however, it can be seen that neither the HZWD, nor the GPT2w, models, i.e., those non- meteorological parameter-based models, performed well in the lower region of the troposphere. In addition, compared with the GPT2w model, HZWD model is a closed model with a limitation to facilitate on-site meteorological observations. Further research is required to assess the variation in and factors influencing of the wet delay and explore the possibility of incorporation of on-site meteorological data.”*

*Suggestions:*

*Remove “,” in “GPT2w, models*

*Replace “lower” by “lowest”*

*Replace “compared with the GPT2w model, HZWD model is a closed model with” by “compared with GPT2w, HZWD is a closed model with”, this way avoiding the repetition of the word “model”.*

*Remove “and” in “in and factors”*

**Authors:** We accepted your suggestions and revised the paragraph. (Page 25, Lines 506-510)
